# Supplementary material for: Working conditions of healthcare workers and clients’ satisfaction with care: study protocol and baseline results of a cluster-randomised workplace intervention
Source: Springer Nature journal article supplement (doi:10.1186/s12889-020-09290-4), 2020-08-25
Supplement: MOESM1 [file 18313742]

# Title: Working conditions of healthcare workers and clients' satisfaction with care: a cluster-randomised workplace intervention

## Supplementary material 1

In this supplementary file, the descriptive statistics of the scales used in the questionnaires are provided.

Table S1. Descriptive statistics of the instruments used in the healthcare workers surveys. SD: standard deviation, Alpha: Cronbach's alpha, n.a: not applicable. N = 386.

| Instruments                                                                                                | Mean  | SD    | Alpha |
|------------------------------------------------------------------------------------------------------------|-------|-------|-------|
| <b>Work Ability Index (WAI)<sup>1</sup> (1)</b>                                                            |       |       |       |
| Physical work ability                                                                                      | 3.16  | 0.95  | n.a.  |
| Mental work ability                                                                                        | 3.03  | 0.92  | n.a.  |
| <b>Copenhagen Psychosocial Questionnaire (COPSOQ)<sup>2</sup> (2)</b>                                      |       |       |       |
| Quantitative demands                                                                                       | 4.29  | 0.46  | 0.68  |
| Emotional demands                                                                                          | 3.82  | 0.61  | 0.73  |
| Influence at work                                                                                          | 3.20  | 0.67  | 0.68  |
| Predictability                                                                                             | 2.86  | 0.71  | 0.59  |
| Role clarity                                                                                               | 2.17  | 0.67  | 0.76  |
| Role conflicts                                                                                             | 3.15  | 0.76  | 0.74  |
| Possibilities for development                                                                              | 2.27  | 0.65  | 0.59  |
| Intention to leave                                                                                         | 1.98  | 0.89  | 0.75  |
| Social community at work                                                                                   | 3.22  | 0.71  | 0.64  |
| Quality of leadership                                                                                      | 3.15  | 0.94  | 0.92  |
| Social support from colleagues                                                                             | 1.93  | 0.70  | 0.85  |
| Work family conflict                                                                                       | 2.64  | 0.87  | 0.83  |
| <b>Activity and Work Analysis in Hospitals (TAA-KH-S)<sup>3</sup> (3)</b>                                  |       |       |       |
| Patient-related demands                                                                                    | 2.59  | 0.30  | 0.71  |
| <b>Effort-Reward-Imbalance (ERI)<sup>4</sup> (4)</b>                                                       |       |       |       |
| Effort                                                                                                     | 2.59  | 0.67  | 0.80  |
| Reward                                                                                                     | 1.83  | 0.56  | 0.79  |
| Overcommitment                                                                                             | 2.60  | 0.59  | 0.57  |
| <b>German Version of the Positive and Negative Affect Scale (PANAS)<sup>5</sup> (5)</b>                    |       |       |       |
| Negative affect                                                                                            | 1.84  | 0.62  | 0.86  |
| <b>Health related Quality of Life – SF 12 (Version of the German Socio-Economic Panel)<sup>6</sup> (6)</b> |       |       |       |
| Physical functioning                                                                                       | 69.90 | 29.36 | n.a.  |

| Instruments        | Mean  | SD    | Alpha |
|--------------------|-------|-------|-------|
| Role physical      | 66.51 | 24.78 | n.a.  |
| Bodily pain        | 65.70 | 28.62 | n.a.  |
| Social functioning | 67.57 | 27.24 | n.a.  |
| Role emotion       | 69.82 | 23.29 | n.a.  |
| Vitality           | 49.63 | 21.71 | n.a.  |
| Mental Health      | 56.68 | 20.40 | n.a.  |
| General Health     | 60.47 | 23.27 | n.a.  |

<sup>1</sup> The WAI assesses the capacity of healthcare workers to manage demands of the psychosocial environment to meet their individual needs of wellbeing, given their mental resources and physical health.

<sup>2</sup> The COPSOQ questionnaire encompasses a broad range of psychosocial work characteristics. The COPSOQ is based on various leading concepts and theories in occupational health.

<sup>3</sup> The TAA-KH-S assesses psychosocial work characteristics of healthcare workers.

<sup>4</sup> The ERI-Model states that a lack in social reciprocity (represented by high efforts and low rewards) can lead to emotional distress and, in consequence, to adverse effects on health.

<sup>5</sup> The PANAS is used to measure mood states in relation to the dimensions positive and negative affect.

<sup>6</sup> The Health-related quality of life (HRQOL) measures an individual's perceived physical and mental health.

Table S2. Descriptive statistics of the instruments used in the patients surveys. SD: standard deviation, Alpha: Cronbach's alpha, n.a: not applicable. N = 632.

| Instruments                                                                                | Mean | SD   | Alpha |
|--------------------------------------------------------------------------------------------|------|------|-------|
| <b>Cologne Patient Questionnaire (KPF)<sup>1</sup> (7)</b>                                 |      |      |       |
| Trust in carers                                                                            | 3.73 | 0.43 | 0.86  |
| Support by carers                                                                          | 3.63 | 0.53 | 0.85  |
| Availability of information and support by carers                                          | 3.61 | 0.50 | 0.81  |
| <b>Health related Quality of Life – SF 12 (Version of the German Socio-Economic Panel)</b> |      |      |       |
| General health                                                                             | 2.91 | 0.99 | n.a.  |
| <b>Individualized Care Scale (ICS)<sup>2</sup> (8)</b>                                     |      |      |       |
| Patients decisional control over care                                                      | 4.35 | 0.54 | 0.66  |

<sup>1</sup> The KPF measures the patient's satisfaction with the quality of care.

<sup>2</sup> The ICS assesses the degree of perceived patient-centred care, and support about decision-making processes about their care.

Table S3. Descriptive statistics of the instruments used in the surveys of individuals in elderly care. SD: standard deviation, Alpha: Cronbach's alpha, n.a: not applicable. N = 150.

| Instruments                                                                                | Mean | SD   | Alpha |
|--------------------------------------------------------------------------------------------|------|------|-------|
| <b>Cologne Patient Questionnaire (KPF)<sup>1</sup></b>                                     |      |      |       |
| Trust in carers                                                                            | 3.61 | 0.57 | 0.82  |
| Support by carers                                                                          | 3.46 | 0.62 | 0.76  |
| Availability of information and support by carers                                          | 3.48 | 0.51 | 0.42  |
| <b>Health related Quality of Life – SF 12 (Version of the German Socio-Economic Panel)</b> |      |      |       |
| General health                                                                             | 2.80 | 0.86 | n.a.  |

| Instruments                                                                         | Mean | SD   | Alpha |
|-------------------------------------------------------------------------------------|------|------|-------|
| <b>Individualized Care Scale (ICS)<sup>2</sup></b>                                  |      |      |       |
| Patients decisional control over care                                               | 4.38 | 0.73 | 0.76  |
| <b>German Version of the Resident Quality of Life Questionnaire<sup>3</sup> (9)</b> |      |      |       |
| Person-focused care                                                                 | 3.30 | 1.13 | 0.85  |

<sup>1</sup> In order to apply the KPF scales to the elderly care, some items were adapted to the appropriate context, and not applicable items were excluded.

<sup>2</sup> In order to apply the ICS scales to the elderly care, some items were adapted to the appropriate context, and not applicable items were excluded.

<sup>3</sup> The Resident Quality of Life Questionnaire measures the quality of life of individuals in elderly nursing homes. In the present study only three items of the scale "person-focused care" were included.

## References

- [1] Hasselhorn H-M, Freude G. Der Work Ability Index – ein Leitfaden. Dortmund: Bundesanstalt für Arbeitsschutz und Arbeitsmedizin; 2007.
- [2] Nübling M, Stöbel U, Hasselhorn H, Michaelis M, Hofmann F. Methoden zur Erfassung psychischer Belastungen. Erprobung eines Messinstruments (COPSOQ). Dortmund: Bundesanstalt für Arbeitsschutz und Arbeitsmedizin; 2005.
- [3] Büssing A, Glaser J. Das Tätigkeits- und Arbeitsanalyseverfahren für das Krankenhaus - Selbstbeobachtungsversion (TAA-KH-S). Göttingen: Hogrefe; 2002.
- [4] Siegrist J, Starke D, Chandola T, Godin I, Marmot M, Niedhammer I et al.. The measurement of Effort-Reward Imbalance at work: European comparisons. *Social Science & Medicine*. 2004;58(8):1483-1499.
- [5] Breyer B, Bluemke M. Deutsche Version der Positive and Negative Affect Schedule PANAS (GESIS Panel). Mannheim: gesis; 2016.
- [6] Nübling M, Andersen H, Mühlbacher A. Entwicklung eines Verfahrens zur Berechnung der körperlichen und psychischen Summenskalen auf Basis der SOEP – Version des SF 12 (Algorithmus). Berlin: DIW Berlin; 2006.
- [7] Pfaff H, Nitzsche A, Scheibler F, Steffen P. Der Kölner Patientenfragebogen für Brustkrebs (KPF-BK). Köln: Universität zu Köln; 2009.
- [8] Köberich S, Suhonen R, Feuchtinger J, Farin E. The German version of the Individualized Care Scale - assessing validity and reliability. *Patient Preference and Adherence*. 2015;:483. <https://doi.org/10.2147/ppa.s77486>.
- [9] Sommerhalder K, Gugler E, Conca A, Bernet M, Bernet N, Serdaly C et al.. Lebens- und Pflegequalität im Pflegeheim – Beschreibende Ergebnisse der Befragung von Bewohnerinnen und Bewohnern in Pflegeheimen in der Schweiz. Residents' Perspectives of Living in Nursing Homes in Switzerland (RESPONS). Bern: Berner Fachhochschule; 2015.
