# Supplementary material for: Working conditions of healthcare workers and clients’ satisfaction with care: study protocol and baseline results of a cluster-randomised workplace intervention
Source: Springer Nature journal article supplement (doi:10.1186/s12889-020-09290-4), 2020-08-25
Supplement: MOESM2 [file 18313742]

# Title: Working conditions of healthcare workers and clients' satisfaction with care: a cluster-randomised workplace intervention

## Supplementary file 2

In this supplementary file, the CONSORT checklist for cluster-randomised trials is provided.

Table S1. CONSORT 2010 checklist of information to include when reporting a cluster randomised trial (1).

| Section/Topic                    | Item No | Standard Checklist item                                                                                                               | Extension for cluster designs                                                                   | Page number and section                                      |
|----------------------------------|---------|---------------------------------------------------------------------------------------------------------------------------------------|-------------------------------------------------------------------------------------------------|--------------------------------------------------------------|
| <b>Title and abstract</b>        |         |                                                                                                                                       |                                                                                                 |                                                              |
|                                  | 1a      | Identification as a randomised trial in the title                                                                                     | Identification as a cluster randomised trial in the title                                       | Introduction, p.1                                            |
|                                  | 1b      | Structured summary of trial design, methods, results, and conclusions (for specific guidance see CONSORT for abstracts)               |                                                                                                 | Abstract, p. 2                                               |
| <b>Introduction</b>              |         |                                                                                                                                       |                                                                                                 |                                                              |
| <b>Background and objectives</b> | 2a      | Scientific background and explanation of rationale                                                                                    | Rationale for using a cluster design                                                            | Study design, p. 4                                           |
|                                  | 2b      | Specific objectives or hypotheses                                                                                                     | Whether objectives pertain to the the cluster level, the individual participant level or both   | Background, p. 3                                             |
| <b>Methods</b>                   |         |                                                                                                                                       |                                                                                                 |                                                              |
| <b>Trial design</b>              | 3a      | Description of trial design (such as parallel, factorial) including allocation ratio                                                  | Definition of cluster and description of how the design features apply to the clusters          | Participants, p. 5; Randomisation and implementation, p. 8-9 |
|                                  | 3b      | Important changes to methods after trial commencement (such as eligibility criteria), with reasons                                    |                                                                                                 | Not applicable                                               |
| <b>Participants</b>              | 4a      | Eligibility criteria for participants                                                                                                 | Eligibility criteria for clusters                                                               | Participants, p. 4-5                                         |
|                                  | 4b      | Settings and locations where the data were collected                                                                                  |                                                                                                 | Outcomes, p. 7-8                                             |
| <b>Interventions</b>             | 5       | The interventions for each group with sufficient details to allow replication, including how and when they were actually administered | Whether interventions pertain to the cluster level, the individual participant level or both    | The intervention, p. 5-7                                     |
| <b>Outcomes</b>                  | 6a      | Completely defined pre-specified primary and secondary outcome measures, including how and when they were assessed                    | Whether outcome measures pertain to the cluster level, the individual participant level or both | Study design, p.4; Participants, p. 4-5; Outcomes, p. 7-8    |

| Section/Topic                           | Item No | Standard Checklist item                                                                                                                                                                     | Extension for cluster designs                                                                                                                                                                                      | Page number and section                                         |
|-----------------------------------------|---------|---------------------------------------------------------------------------------------------------------------------------------------------------------------------------------------------|--------------------------------------------------------------------------------------------------------------------------------------------------------------------------------------------------------------------|-----------------------------------------------------------------|
|                                         | 6b      | Any changes to trial outcomes after the trial commenced, with reasons                                                                                                                       |                                                                                                                                                                                                                    | Not applicable                                                  |
| <b>Sample size</b>                      | 7a      | How sample size was determined                                                                                                                                                              | Method of calculation, number of clusters(s) (and whether equal or unequal cluster sizes are assumed), cluster size, a coefficient of intracluster correlation (ICC or $k$ ), and an indication of its uncertainty | Sample size, p. 8                                               |
|                                         | 7b      | When applicable, explanation of any interim analyses and stopping guidelines                                                                                                                |                                                                                                                                                                                                                    | Not applicable                                                  |
| <b>Randomisation:</b>                   |         |                                                                                                                                                                                             |                                                                                                                                                                                                                    |                                                                 |
| <b>Sequence generation</b>              | 8a      | Method used to generate the random allocation sequence                                                                                                                                      |                                                                                                                                                                                                                    | Randomisation and implementation, p. 8-9                        |
|                                         | 8b      | Type of randomisation; details of any restriction (such as blocking and block size)                                                                                                         | Details of stratification or matching if used                                                                                                                                                                      | Randomisation and implementation, p. 8-9                        |
| <b>Allocation concealment mechanism</b> | 9       | Mechanism used to implement the random allocation sequence (such as sequentially numbered containers), describing any steps taken to conceal the sequence until interventions were assigned | Specification that allocation was based on clusters rather than individuals and whether allocation concealment (if any) was at the cluster level, the individual participant level or both                         | Allocation concealment mechanism, p. 9-10                       |
| <b>Implementation</b>                   | 10      | Who generated the random allocation sequence, who enrolled participants, and who assigned participants to interventions                                                                     | Replace by 10a, 10b and 10c                                                                                                                                                                                        | Randomisation and implementation, p. 8-9                        |
|                                         | 10a     |                                                                                                                                                                                             | Who generated the random allocation sequence, who enrolled clusters, and who assigned clusters to interventions                                                                                                    | Randomisation and implementation, p. 8-9                        |
|                                         | 10b     |                                                                                                                                                                                             | Mechanism by which individual participants were included in clusters for the purposes of the trial (such as complete enumeration, random sampling)                                                                 | Randomisation and implementation, p. 8-9                        |
|                                         | 10c     |                                                                                                                                                                                             | From whom consent was sought (representatives of the cluster, or individual cluster members, or both), and whether consent was sought before or after randomisation                                                | Participants, p. 4-5                                            |
| <b>Blinding</b>                         |         |                                                                                                                                                                                             |                                                                                                                                                                                                                    |                                                                 |
|                                         | 11a     | If done, who was blinded after assignment to interventions (for example, participants, care providers, those assess-                                                                        |                                                                                                                                                                                                                    | Not applicable; complete blinding is not feasible in this study |

| Section/Topic                                               | Item No | Standard Checklist item                                                                                                                           | Extension for cluster designs                                                                                                                 | Page number and section                   |
|-------------------------------------------------------------|---------|---------------------------------------------------------------------------------------------------------------------------------------------------|-----------------------------------------------------------------------------------------------------------------------------------------------|-------------------------------------------|
|                                                             |         | ing outcomes) and how                                                                                                                             |                                                                                                                                               |                                           |
|                                                             | 11b     | If relevant, description of the similarity of interventions                                                                                       |                                                                                                                                               | Not applicable                            |
| <b>Statistical methods</b>                                  | 12a     | Statistical methods used to compare groups for primary and secondary outcomes                                                                     | How clustering was taken into account                                                                                                         | Statistical methods, p. 10-11             |
|                                                             | 12b     | Methods for additional analyses, such as subgroup analyses and adjusted analyses                                                                  |                                                                                                                                               | Statistical methods, p. 10-11             |
| <b>Results</b>                                              |         |                                                                                                                                                   |                                                                                                                                               |                                           |
| <b>Participant flow (a diagram is strongly recommended)</b> | 13a     | For each group, the numbers of participants who were randomly assigned, received intended treatment, and were analysed for the primary outcome    | For each group, the numbers of clusters that were randomly assigned, received intended treatment, and were analysed for the primary outcome   | Results, p. 11-12; Figure 1: Flow diagram |
|                                                             | 13b     | For each group, losses and exclusions after randomisation, together with reasons                                                                  | For each group, losses and exclusions for both clusters and individual cluster members                                                        | Results, p. 11-12; Figure 1: Flow diagram |
| <b>Recruitment</b>                                          | 14a     | Dates defining the periods of recruitment and follow-up                                                                                           |                                                                                                                                               | Study design, p. 4                        |
|                                                             | 14b     | Why the trial ended or was stopped                                                                                                                |                                                                                                                                               | Not applicable                            |
| <b>Baseline data</b>                                        | 15      | A table showing baseline demographic and clinical characteristics for each group                                                                  | Baseline characteristics for the individual and cluster levels as applicable for each group                                                   | Results, p. 13, Table 1                   |
| <b>Numbers analysed</b>                                     | 16      | For each group, number of participants (denominator) included in each analysis and whether the analysis was by original assigned groups           | For each group, number of clusters included in each analysis                                                                                  | Results, p. 12, Figure 1                  |
| <b>Outcomes and estimation</b>                              | 17a     | For each primary and secondary outcome, results for each group, and the estimated effect size and its precision (such as 95% confidence interval) | Results at the individual or cluster level as applicable and a coefficient of intracluster correlation (ICC or $k$ ) for each primary outcome | Results, p. 12                            |
|                                                             | 17b     | For binary outcomes, presentation of both absolute and relative effect sizes is recommended                                                       |                                                                                                                                               | Not applicable                            |
| <b>Ancillary analyses</b>                                   | 18      | Results of any other analyses performed, including subgroup analyses and adjusted analyses, distinguishing pre-specified from exploratory         |                                                                                                                                               | Results, p. 15-16, Tables 2 and 3         |
| <b>Harms</b>                                                | 19      | All important harms or unintended effects in each group (for specific guidance see CONSORT for harms)                                             |                                                                                                                                               | Not applicable                            |

| Section/Topic            | Item No | Standard Checklist item                                                                                          | Extension for cluster designs                                             | Page number and section |
|--------------------------|---------|------------------------------------------------------------------------------------------------------------------|---------------------------------------------------------------------------|-------------------------|
| <b>Discussion</b>        |         |                                                                                                                  |                                                                           |                         |
| <b>Limitations</b>       | 20      | Trial limitations, addressing sources of potential bias, imprecision, and, if relevant, multiplicity of analyses |                                                                           | Discussion, p. 18       |
| <b>Generalisability</b>  | 21      | Generalisability (external validity, applicability) of the trial findings                                        | Generalisability to clusters and/or individual participants (as relevant) | Discussion, p. 18       |
| <b>Interpretation</b>    | 22      | Interpretation consistent with results, balancing benefits and harms, and considering other relevant evidence    |                                                                           | Discussion, p. 17-18    |
| <b>Other information</b> |         |                                                                                                                  |                                                                           |                         |
| <b>Registration</b>      | 23      | Registration number and name of trial registry                                                                   |                                                                           | Abstract, p. 3          |
| <b>Protocol</b>          | 24      | Where the full trial protocol can be accessed, if available                                                      |                                                                           | Not applicable          |
| <b>Funding</b>           | 25      | Sources of funding and other support (such as supply of drugs), role of funders                                  |                                                                           | Funding, p. 19          |

## References

[1] Campbell MK, Piaggio G, Elbourne DR, Altman DG. Consort 2010 statement: extension to cluster randomised trials. *BMJ*. 2012;345 (sep04 1):e5661-e5661. <https://doi.org/10.1136/bmj.e5661>.
